# Supplementary material
Source: PubMed Central journal article supplement (PMC5916010)
Supplement: ba018531-suppl1.pdf [file ba018531-suppl1.pdf]

# Supplementary Appendix

## Table of Contents

|                                                                                          |   |
|------------------------------------------------------------------------------------------|---|
| Supplemental Section 1: CIBMTR Data Source.....                                          | 2 |
| Supplemental Table 1: Variables tested in Cox proportional hazards regression model..... | 3 |
| Supplemental Table 2: Complete Multivariable Analysis Results .....                      | 4 |
| Supplemental Table 3: Cause of Death.....                                                | 9 |

## Supplemental Section 1: CIBMTR Data Source

The CIBMTR is a working group of more than 500 transplantation centers worldwide that contribute detailed data on HCT to a statistical center at the Medical College of Wisconsin (MCW). Participating centers are required to report all transplantations consecutively and compliance is monitored by on-site audits. Computerized checks for discrepancies, physicians' review of submitted data, and on-site audits of participating centers ensure data quality.

Observational studies conducted by the CIBMTR are performed in compliance with all applicable federal regulations pertaining to the protection of human research participants. The MCW and National Marrow Donor Program, Institutional Review Boards approved this study.

The CIBMTR collects data at two levels: Transplant Essential Data (TED) and Comprehensive Report Form (CRF) data. TED-data includes disease type, age, gender, pre-HCT disease stage and chemotherapy-responsiveness, date of diagnosis, graft type, conditioning regimen, post-transplant disease progression and survival, development of a new malignancy, and cause of death. All CIBMTR centers contribute TED-data. More detailed disease and pre- and post-transplant clinical information is collected on a subset of registered patients selected for CRF data by a weighted randomization scheme. TED- and CRF-level data are collected pre-transplant, 100-days, and six months post-HCT and annually thereafter or until death. Data for the current analysis were retrieved from CIBMTR (TED and CRF) report forms.

## Supplemental Table 1: Variables tested in Cox proportional hazards regression model

### Main effect:

- **Patient age at HCT**, 55-64 vs. ≥65

### Patient-related:

- **Patient sex**: male vs. female
- **Karnofsky performance status** at transplant: ≥90 vs. <90 vs missing
- **HCT comorbidity index** at transplant: 0 vs 1-2 vs. ≥ 3 vs missing
- **Patient race**: Caucasian vs. other

### Disease-related:

- **Diagnosis**: FL vs. DLBCL vs MCL vs Mature T/NK cell lymphoma vs NHL others
- **Chemosensitivity status prior to HCT**: chemosensitive vs. refractory vs. untreated/unknown
- **History of autologous transplant**: No vs. Yes
- **Time from diagnosis to HCT**: >24 months vs. ≤24 months

### Transplant-related:

- **Graft source**: peripheral blood vs bone marrow
- **Transplant donor type**: Matched related vs matched unrelated (8/8) vs mismatched unrelated
- **GVHD prophylaxis**: CNI+MTX+others vs CNI+MMF+others vs CNI + other(s) except MMF, MTX, post CY vs. Others vs. missing
- **Donor-Recipient CMV match**: Donor+/Recipient – vs. others vs. missing
- **ATG/alemtuzumab**: no vs. yes vs. missing
- **Year of transplant**: continuous

Supplemental Table 2: Complete Multivariable Analysis Results

|                                                  | N    | RR   | 95% CI<br>Lower<br>Limit | 95% CI<br>Upper<br>Limit | p-value | Overall<br>p-value |
|--------------------------------------------------|------|------|--------------------------|--------------------------|---------|--------------------|
| <b>Non-relapse mortality</b>                     |      |      |                          |                          |         |                    |
| <b>Main effect</b>                               |      |      |                          |                          |         |                    |
| <b>Age</b>                                       |      |      |                          |                          |         |                    |
| 55-64                                            | 1166 | 1    |                          |                          |         | 0.02               |
| ≥65                                              | 436  | 1.29 | 1.04                     | 1.61                     | 0.02    |                    |
| <b>Karnofsky performance score</b>               |      |      |                          |                          |         |                    |
| ≥90                                              | 965  | 1    |                          |                          |         | <.0001             |
| <90                                              | 571  | 1.52 | 1.24                     | 1.88                     | <.0001  |                    |
| Missing                                          | 66   | 1.54 | 0.94                     | 2.53                     | 0.09    |                    |
| <b>HCT-CI</b>                                    |      |      |                          |                          |         |                    |
| 0                                                | 489  | 1    |                          |                          |         | <.0001             |
| 1 -2                                             | 480  | 1.04 | 0.78                     | 1.38                     | 0.78    |                    |
| ≥3                                               | 617  | 1.63 | 1.27                     | 2.10                     | 0.0001  |                    |
| Missing                                          | 16   | 0.68 | 0.21                     | 2.21                     | 0.52    |                    |
| <b>Prior auto</b>                                |      |      |                          |                          |         |                    |
| No                                               | 1022 | 1    |                          |                          |         | 0.002              |
| Yes                                              | 580  | 1.39 | 1.13                     | 1.71                     | 0.002   |                    |
| <b>Donor type &amp; ATG/Campath</b>              |      |      |                          |                          |         |                    |
| Matched related donor and ATG/Campath = No       | 609  | 1    |                          |                          |         | <.0001             |
| Matched related donor and ATG/Campath = Yes      | 79   | 1.54 | 0.93                     | 2.54                     | 0.09    |                    |
| Matched unrelated donor and ATG/Campath = No     | 438  | 1.48 | 1.13                     | 1.93                     | 0.004   |                    |
| Matched unrelated donor and ATG/Campath = Yes    | 301  | 1.54 | 1.14                     | 2.07                     | 0.005   |                    |
| Mismatched unrelated donor and ATG/Campath = No  | 109  | 1.96 | 1.36                     | 2.84                     | .0003   |                    |
| Mismatched unrelated donor and ATG/Campath = Yes | 66   | 2.75 | 1.78                     | 4.24                     | <.0001  |                    |
| <b>Relapse</b>                                   |      |      |                          |                          |         |                    |
| <b>Main Effect</b>                               |      |      |                          |                          |         |                    |
| <b>Age</b>                                       |      |      |                          |                          |         |                    |
| 55-64                                            | 1166 | 1    |                          |                          |         | 0.80               |

|                                          | N    | RR   | 95% CI<br>Lower<br>Limit | 95% CI<br>Upper<br>Limit | p-value | Overall<br>p-value |
|------------------------------------------|------|------|--------------------------|--------------------------|---------|--------------------|
| ≥65                                      | 436  | 1.02 | 0.86                     | 1.22                     | 0.80    |                    |
| <b>Subtype of lymphoma</b>               |      |      |                          |                          |         |                    |
| Follicular                               | 350  | 1    |                          |                          |         | <.0001             |
| DLBCL                                    | 479  | 1.89 | 1.48                     | 2.42                     | <.0001  |                    |
| Mantle cell                              | 382  | 1.75 | 1.36                     | 2.25                     | <.0001  |                    |
| Mature T/NK-cell                         | 321  | 1.93 | 1.49                     | 2.51                     | <.0001  |                    |
| NHL, other                               | 70   | 1.20 | 0.76                     | 1.88                     | 0.44    |                    |
| <b>Time from diagnosis to transplant</b> |      |      |                          |                          |         |                    |
| >24 months                               | 1018 | 1    |                          |                          |         | 0.003              |
| ≤24 months                               | 584  | 1.28 | 1.09                     | 1.51                     | 0.003   |                    |
| <b>Race</b>                              |      |      |                          |                          |         |                    |
| Caucasian                                | 1495 | 1    |                          |                          |         | 0.021              |
| Other                                    | 107  | 1.39 | 1.05                     | 1.84                     | 0.02    |                    |
| <b>Disease status (≤12 months)</b>       |      |      |                          |                          |         |                    |
| Sensitive                                | 1366 | 1    |                          |                          |         | <.0001             |
| Resistant                                | 236  | 2.50 | 2.03                     | 3.09                     | <.0001  |                    |
| <b>Disease status (&gt;12 months)</b>    |      |      |                          |                          |         |                    |
| Sensitive                                | 766  | 1    |                          |                          |         | 0.33               |
| Resistant                                | 74   | 0.76 | 0.44                     | 1.32                     | 0.33    |                    |
| <b>GVHD prophylaxis (≤18 months)</b>     |      |      |                          |                          |         |                    |
| CNI + MTX + other(s) except MMF, post CY | 767  | 1    |                          |                          |         | 0.49               |
| CNI + MMF + other(s) except post CY      | 544  | 1.09 | 0.90                     | 1.32                     | 0.38    |                    |
| CNI + other(s) except MMF, MTX, post CY  | 190  | 0.89 | 0.66                     | 1.18                     | 0.41    |                    |
| Others                                   | 101  | 0.90 | 0.62                     | 1.32                     | 0.60    |                    |
| <b>GVHD prophylaxis (&gt;18 months)</b>  |      |      |                          |                          |         |                    |
| CNI + MTX + other(s) except MMF, post CY | 333  | 1    |                          |                          |         | <.0001             |
| CNI + MMF + other(s) except post CY      | 225  | 0.90 | 0.61                     | 1.34                     | 0.61    |                    |
| CNI + other(s) except MMF, MTX, post CY  | 87   | 0.97 | 0.53                     | 1.76                     | 0.91    |                    |
| Others                                   | 41   | 3.59 | 2.06                     | 6.28                     | <.0001  |                    |
| <b>Progression-free survival</b>         |      |      |                          |                          |         |                    |

|                                                  | N    | RR   | 95% CI<br>Lower<br>Limit | 95% CI<br>Upper<br>Limit | p-value | Overall<br>p-value |
|--------------------------------------------------|------|------|--------------------------|--------------------------|---------|--------------------|
| <b>Main effect</b>                               |      |      |                          |                          |         |                    |
| <b>Age</b>                                       |      |      |                          |                          |         |                    |
| 55-64                                            | 1166 | 1    |                          |                          |         | 0.14               |
| ≥65                                              | 436  | 1.11 | 0.97                     | 1.27                     | 0.14    |                    |
| <b>Karnofsky score</b>                           |      |      |                          |                          |         |                    |
| ≥90                                              | 965  | 1    |                          |                          |         | 0.003              |
| <90                                              | 571  | 1.25 | 1.10                     | 1.43                     | 0.0007  |                    |
| Missing                                          | 66   | 1.14 | 0.83                     | 1.55                     | 0.43    |                    |
| <b>HCT-CI</b>                                    |      |      |                          |                          |         |                    |
| 0                                                | 489  | 1    |                          |                          |         | 0.007              |
| 1 -2                                             | 480  | 1.07 | 0.91                     | 1.26                     | 0.43    |                    |
| ≥3                                               | 617  | 1.29 | 1.10                     | 1.50                     | 0.001   |                    |
| Missing                                          | 16   | 0.92 | 0.48                     | 1.76                     | 0.80    |                    |
| <b>Subtype of lymphoma</b>                       |      |      |                          |                          |         |                    |
| Follicular                                       | 350  | 1    |                          |                          |         | <.0001             |
| DLBCL                                            | 479  | 1.64 | 1.36                     | 1.97                     | <.0001  |                    |
| Mantle cell                                      | 382  | 1.49 | 1.23                     | 1.80                     | <.0001  |                    |
| Mature T/NK-cell                                 | 321  | 1.58 | 1.30                     | 1.93                     | <.0001  |                    |
| NHL, other                                       | 70   | 1.24 | 0.89                     | 1.73                     | 0.20    |                    |
| <b>Donor type &amp; ATG/Campath</b>              |      |      |                          |                          |         |                    |
| Matched related donor and ATG/Campath = No       | 609  | 1    |                          |                          |         | 0.023              |
| Matched related donor and ATG/Campath = Yes      | 79   | 1.20 | 0.89                     | 1.61                     | 0.23    |                    |
| Matched unrelated donor and ATG/Campath = No     | 438  | 1.00 | 0.85                     | 1.18                     | 0.98    |                    |
| Matched unrelated donor and ATG/Campath = Yes    | 301  | 1.15 | 0.97                     | 1.37                     | 0.12    |                    |
| Mismatched unrelated donor and ATG/Campath = No  | 109  | 1.01 | 0.78                     | 1.30                     | 0.96    |                    |
| Mismatched unrelated donor and ATG/Campath = Yes | 66   | 1.60 | 1.19                     | 2.13                     | 0.002   |                    |
| <b>Disease status ( ≤12 months)</b>              |      |      |                          |                          |         |                    |
| Sensitive                                        | 1366 | 1    |                          |                          |         | <.0001             |
| Resistant                                        | 236  | 2.05 | 1.71                     | 2.45                     | <.0001  |                    |

|                                          | N    | RR   | 95% CI<br>Lower<br>Limit | 95% CI<br>Upper<br>Limit | p-value | Overall<br>p-value |
|------------------------------------------|------|------|--------------------------|--------------------------|---------|--------------------|
| <b>Disease status (&gt;12 months)</b>    |      |      |                          |                          |         |                    |
| Sensitive                                | 766  | 1    |                          |                          |         | 0.58               |
| Resistant                                | 74   | 0.90 | 0.60                     | 1.33                     | 0.58    |                    |
| <b>GVHD prophylaxis (≤18 months)</b>     |      |      |                          |                          |         |                    |
| CNI + MTX + other(s) except MMF, post CY | 767  | 1    |                          |                          |         | 0.24               |
| CNI + MMF + other(s) except post CY      | 544  | 1.13 | 0.96                     | 1.32                     | 0.13    |                    |
| CNI + other(s) except MMF, MTX, post CY  | 190  | 0.90 | 0.71                     | 1.14                     | 0.36    |                    |
| Others                                   | 101  | 1.03 | 0.76                     | 1.38                     | 0.86    |                    |
| <b>GVHD prophylaxis (&gt;18 months)</b>  |      |      |                          |                          |         |                    |
| CNI + MTX + other(s) except MMF, post CY | 333  | 1    |                          |                          |         | <.0001             |
| CNI + MMF + other(s) except post CY      | 225  | 1.04 | 0.76                     | 1.42                     | 0.80    |                    |
| CNI + other(s) except MMF, MTX, post CY  | 87   | 1.69 | 1.14                     | 2.52                     | 0.01    |                    |
| Others                                   | 41   | 3.45 | 2.15                     | 5.52                     | <.0001  |                    |
| <b>Overall survival</b>                  |      |      |                          |                          |         |                    |
| <b>Main effect</b>                       |      |      |                          |                          |         |                    |
| <b>Age</b>                               |      |      |                          |                          |         |                    |
| 55-64                                    | 1166 | 1    |                          |                          |         | 0.10               |
| ≥65                                      | 436  | 1.14 | 0.97                     | 1.33                     | 0.10    |                    |
| <b>Karnofsky performance score</b>       |      |      |                          |                          |         |                    |
| ≥90                                      | 965  | 1    |                          |                          |         | 0.0007             |
| <90                                      | 571  | 1.34 | 1.15                     | 1.56                     | 0.0001  |                    |
| Missing                                  | 66   | 1.11 | 0.78                     | 1.58                     | 0.56    |                    |
| <b>HCT-CI</b>                            |      |      |                          |                          |         |                    |
| 0                                        | 489  | 1    |                          |                          |         | 0.001              |
| 1 -2                                     | 480  | 0.95 | 0.79                     | 1.16                     | 0.62    |                    |
| ≥3                                       | 617  | 1.30 | 1.09                     | 1.55                     | 0.003   |                    |
| Missing                                  | 16   | 0.84 | 0.39                     | 1.80                     | 0.65    |                    |
| <b>Subtype of lymphoma</b>               |      |      |                          |                          |         |                    |
| Follicular                               | 350  | 1    |                          |                          |         | <.0001             |
| DLBCL                                    | 479  | 1.86 | 1.50                     | 2.31                     | <.0001  |                    |
| Mantle cell                              | 382  | 1.53 | 1.22                     | 1.93                     | 0.0002  |                    |
| Mature T/NK-cell                         | 321  | 1.48 | 1.17                     | 1.88                     | 0.001   |                    |
| NHL, other                               | 70   | 1.78 | 1.25                     | 2.55                     | 0.002   |                    |
| <b>Disease status</b>                    |      |      |                          |                          |         |                    |
| Sensitive                                | 1366 | 1    |                          |                          |         | 0.0002             |

|                                                     | N   | RR   | 95% CI<br>Lower<br>Limit | 95% CI<br>Upper<br>Limit | p-value | Overall<br>p-value |
|-----------------------------------------------------|-----|------|--------------------------|--------------------------|---------|--------------------|
| Resistant                                           | 236 | 1.43 | 1.19                     | 1.73                     | 0.0002  |                    |
|                                                     |     |      |                          |                          |         |                    |
| <b>Donor type &amp; ATG/Campath</b>                 |     |      |                          |                          |         |                    |
| Matched related donor and ATG/Campath<br>= No       | 609 | 1    |                          |                          |         | 0.02               |
| Matched related donor and ATG/Campath<br>= Yes      | 79  | 1.13 | 0.81                     | 1.60                     | 0.47    |                    |
| Matched unrelated donor and<br>ATG/Campath = No     | 438 | 1.08 | 0.90                     | 1.30                     | 0.41    |                    |
| Matched unrelated donor and<br>ATG/Campath = Yes    | 301 | 1.20 | 0.98                     | 1.46                     | 0.09    |                    |
| Mismatched unrelated donor and<br>ATG/Campath = No  | 109 | 1.19 | 0.89                     | 1.58                     | 0.24    |                    |
| Mismatched unrelated donor and<br>ATG/Campath = Yes | 66  | 1.79 | 1.29                     | 2.48                     | 0.0005  |                    |



### Supplemental Table 3: Cause of Death

|                                            | 55-64    | ≥65     |
|--------------------------------------------|----------|---------|
| <b>Total number of deaths</b>              | 550      | 232     |
| <b>Primary disease</b>                     | 212 (39) | 79 (34) |
| <b>GVHD</b>                                | 86 (16)  | 32 (14) |
| <b>Infection</b>                           | 76 (14)  | 39 (17) |
| <b>Organ failure</b>                       | 71 (13)  | 28 (12) |
| <b>Secondary malignancy</b>                | 20 (3)   | 4 (2)   |
| <b>Interstitial Pneumonitis</b>            | 6 (1)    | 2 (1)   |
| <b>Acute Respiratory Distress Syndrome</b> | 1 (<1)   | 1 (<1)  |
| <b>Graft rejection</b>                     | 1 (<1)   | 2 (1)   |
| <b>Hemorrhage</b>                          | 4 (1)    | 2 (1)   |
| <b>Other cause<sup>1</sup></b>             | 49 (9)   | 35 (15) |
| <b>Missing</b>                             | 24 (4)   | 8 (3)   |

<sup>1</sup>Other causes: 55-64: 1 diffuse alveolar hemorrhage; 1 fludarabine toxicity; 1 hepatic encephalopathy; 1 lung cancer; 1 pleural effusion; 1 stroke; 2 sudden death; 1 suicide; 1 unknown; 1 autopsy declined by family; 38 NOS.

≥65: 1 TENS; 1 sudden death; 1 pulmonary embolism; 5 kidney disease; 1 neurologic disease; 1 metabolic encephalopathy; 1 ischemic stroke; 1 HLH; 1 deconditioning; 1 altered mental status; 1 ARDS; 1 aspiration pneumonia; 2 cardiac arrest; 1 failure to thrive from toxicity of prograf; 3 pneumonia; 1 progressive dementia; 1 respiratory distress; 1 uncal herniation; 1 uncharacterized neurodegenerative illness; 1 unknown; 8 NOS.
